# Supplementary material for: An intercomparison study of four different techniques for measuring the chemical composition of nanoparticles
Source: Copernicus journal article supplement (doi:10.5194/acp-23-6613-2023), 2023-06-15
Supplement: Supplementary file 1 [file acp-23-6613-2023-supplement.pdf]

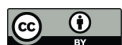

*Supplement of*

## **An intercomparison study of four different techniques for measuring the chemical composition of nanoparticles**

**Lucía Caudillo et al.**

*Correspondence to:* Lucía Caudillo ([lucia.caudillo@iau.uni-frankfurt.de](mailto:lucia.caudillo@iau.uni-frankfurt.de)) and Joachim Curtius ([curtius@iau.uni-frankfurt.de](mailto:curtius@iau.uni-frankfurt.de))

The copyright of individual parts of the supplement might differ from the article licence.

# An intercomparison study of four different techniques for measuring chemical composition of nanoparticles

## Supplementary Material

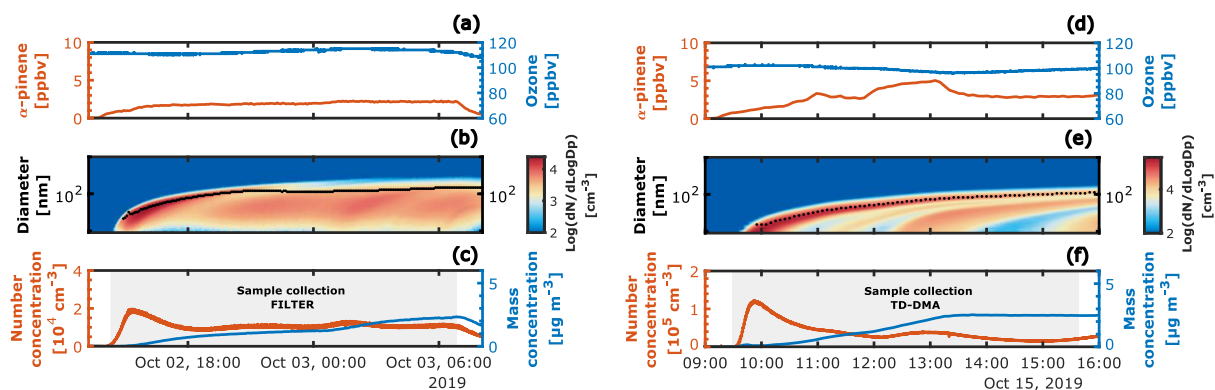

5

Figure S1. Experimental overview of biogenic new particle formation experiments performed at  $-10\text{ }^{\circ}\text{C}$  (left) and  $-50\text{ }^{\circ}\text{C}$  (right). Figures (a) and (d), show the mixing ratio in ppbv for the precursor gases,  $\alpha$ -pinene, and ozone at  $-10\text{ }^{\circ}\text{C}$  and  $-50\text{ }^{\circ}\text{C}$ , respectively. Figures (b) and (e) particle size distribution measured by the SMPS; the color scale represents the log 10 of the normalized particle concentration per cubic centimeter ( $\text{cm}^{-3}$ ). The median mass diameter (MMD) is shown with a black dashed line. Figures (c) and (f), particle number concentration in  $\text{cm}^{-3}$  measured by the CPC with a cut-off diameter of 2.5 nm and mass concentration in  $\mu\text{g m}^{-3}$  (obtained by integrating the normalized mass concentration from the SMPS), the gray shaded areas refer to the particle collection period used for the comparison with EESI-TOF and FIGAERO. The sample collection period for the intercomparison was determined by the FILTER at  $-10\text{ }^{\circ}\text{C}$  and by the TD-DMA at  $-50\text{ }^{\circ}\text{C}$ .

10

15

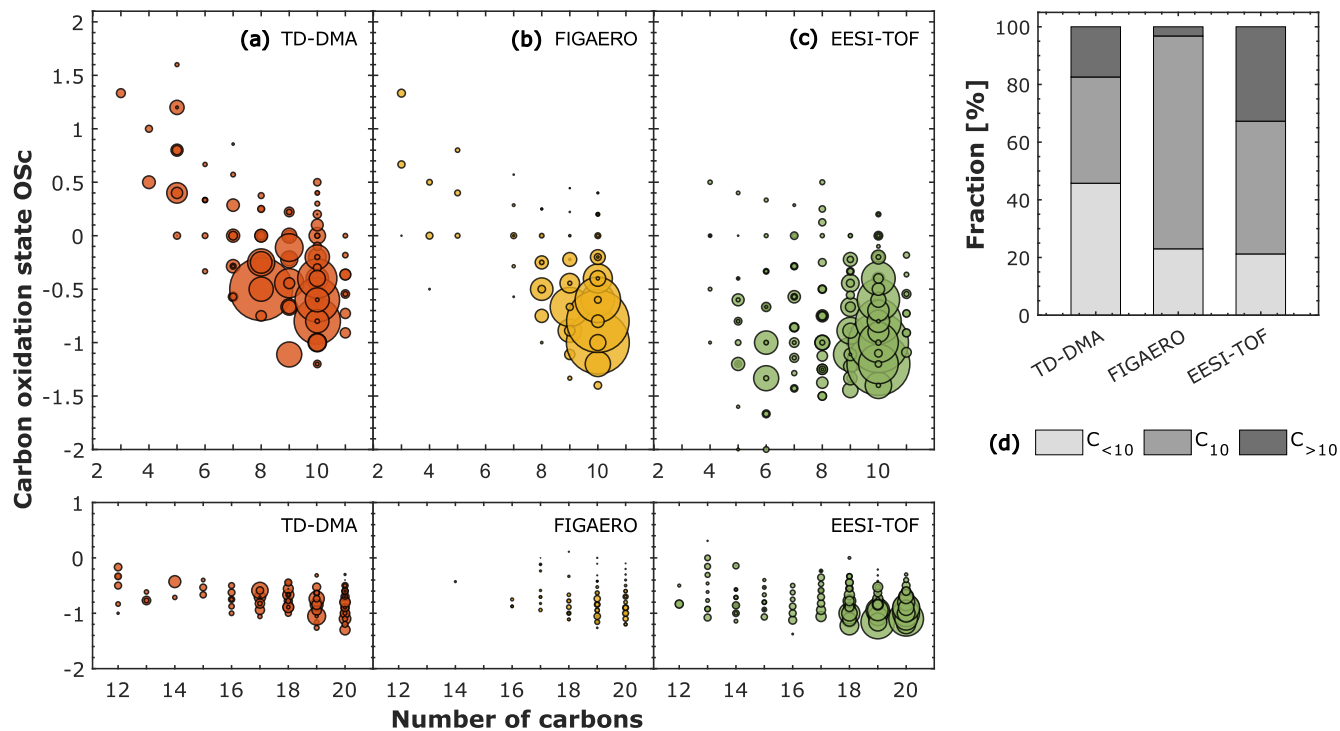

20 Figure S2. Carbon oxidation state OSc against the number of carbon atoms for  $\alpha$ -pinene oxidation products in the particle-phase at  $-50\text{ }^{\circ}\text{C}$  and 20 % RH measured by three different techniques. (a) TD-DMA: Thermal Desorption-Differential Mobility Analyzer coupled to a  $\text{NO}_3$  chemical ionization-atmospheric-pressure-interface-time-of-flight mass spectrometer. (b) FIGAERO: Filter Inlet for Gases and AEROsols coupled to an I<sup>-</sup> high-resolution time-of-flight chemical-ionization mass spectrometer, and (c) EESI-TOF: Extractive Electrospray  $\text{Na}^+$  Ionization time-of-flight mass spectrometer. The level of  $\alpha$ -pinene was between 1 and 6 ppbv while the ozone level was  $\sim 100$  ppbv. The carbon oxidation state is calculated as follows:  $\text{OSc} = 2x\text{O}:\text{C} - \text{H}:\text{C}$ . The symbol sizes in (a), (b), and (c) represent the intensities normalized by the total signal in each system. (d) Fraction of species in the particle-phase containing less than 10 carbon atoms ( $C_{<10}$ ), 10 carbon atoms ( $C_{10}$ ), and more than 10 carbon atoms ( $C_{>10}$ ). The fraction was calculated by normalizing the intensities by the total signal in each system.

25

30

35

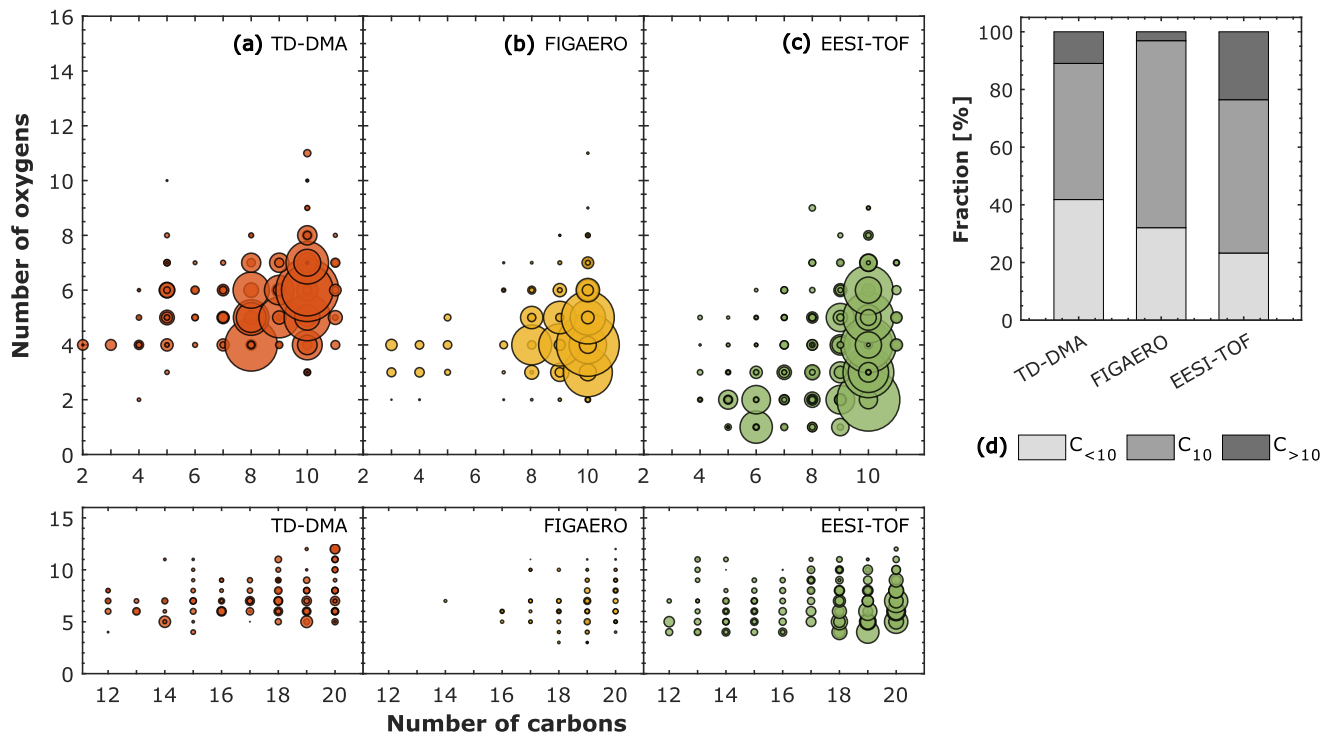

40 **Figure S3. Number of oxygen atoms against the number of carbon atoms for  $\alpha$ -pinene oxidation products in the particle-phase at -**  
**30 °C and 20 % RH measured by three different techniques. (a) TD-DMA: Thermal Desorption-Differential Mobility Analyzer**  
**coupled to a  $\text{NO}_3^-$  chemical ionization-atmospheric-pressure-interface-time-of-flight mass spectrometer. (b) FIGAERO: Filter**  
**Inlet for Gases and AEROsols coupled to an I<sup>-</sup> high-resolution time-of-flight chemical-ionization mass spectrometer, and (c) EESI-**  
45 **TOF: Extractive Electrospray  $\text{Na}^+$  Ionization time-of-flight mass spectrometer. The level of  $\alpha$ -pinene was between 1 and 6 ppbv**  
**while the ozone level was ~100 ppbv. The symbol sizes in (a), (b), and (c) represent the intensities normalized by the total signal in**  
**each system. (d) Fraction of species in the particle-phase containing less than 10 carbon atoms ( $C_{<10}$ ), 10 carbon atoms ( $C_{10}$ ), and**  
**more than 10 carbon atoms ( $C_{>10}$ ). The fraction was calculated by normalizing the intensities by the total signal in each system.**

50

55

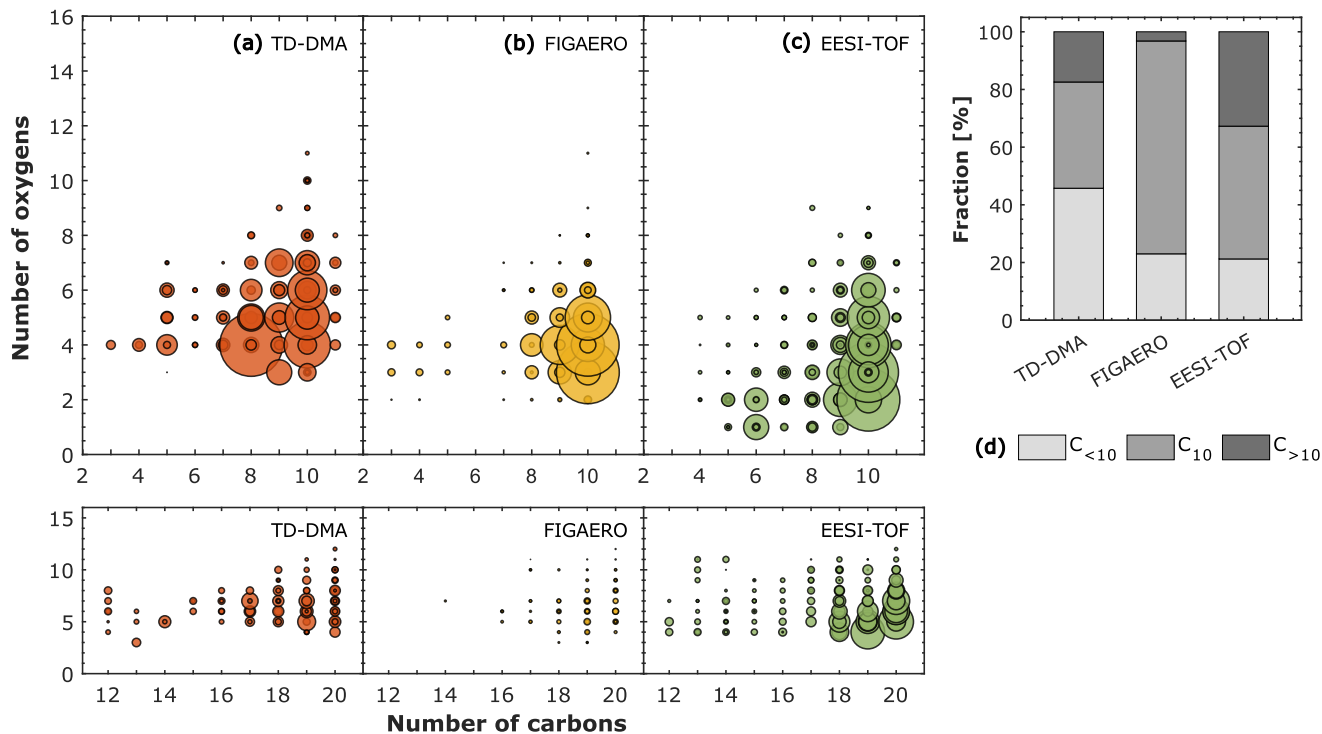

60

**Figure S4.** Number of oxygen atoms against the number of carbon atoms for  $\alpha$ -pinene oxidation products in the particle-phase at -50 °C and 20 % RH measured by three different techniques. (a) TD-DMA: Thermal Desorption-Differential Mobility Analyzer coupled to a  $\text{NO}_3^-$  chemical ionization-atmospheric-pressure-interface-time-of-flight mass spectrometer. (b) FIGAERO: Filter Inlet for Gases and AEROsols coupled to an I<sup>-</sup> high-resolution time-of-flight chemical-ionization mass spectrometer, and (c) EESI-TOF: Extractive Electrospray  $\text{Na}^+$  Ionization time-of-flight mass spectrometer. The level of  $\alpha$ -pinene was between 1 and 6 ppbv while the ozone level was ~ 100 ppbv. The symbol sizes in (a), (b), and (c) represent the intensities normalized by the total signal in each system. (d) Fraction of species in the particle-phase containing less than 10 carbon atoms ( $C_{<10}$ ), 10 carbon atoms ( $C_{10}$ ), and more than 10 carbon atoms ( $C_{>10}$ ). The fraction was calculated by normalizing the intensities by the total signal in each system.

65

70

75

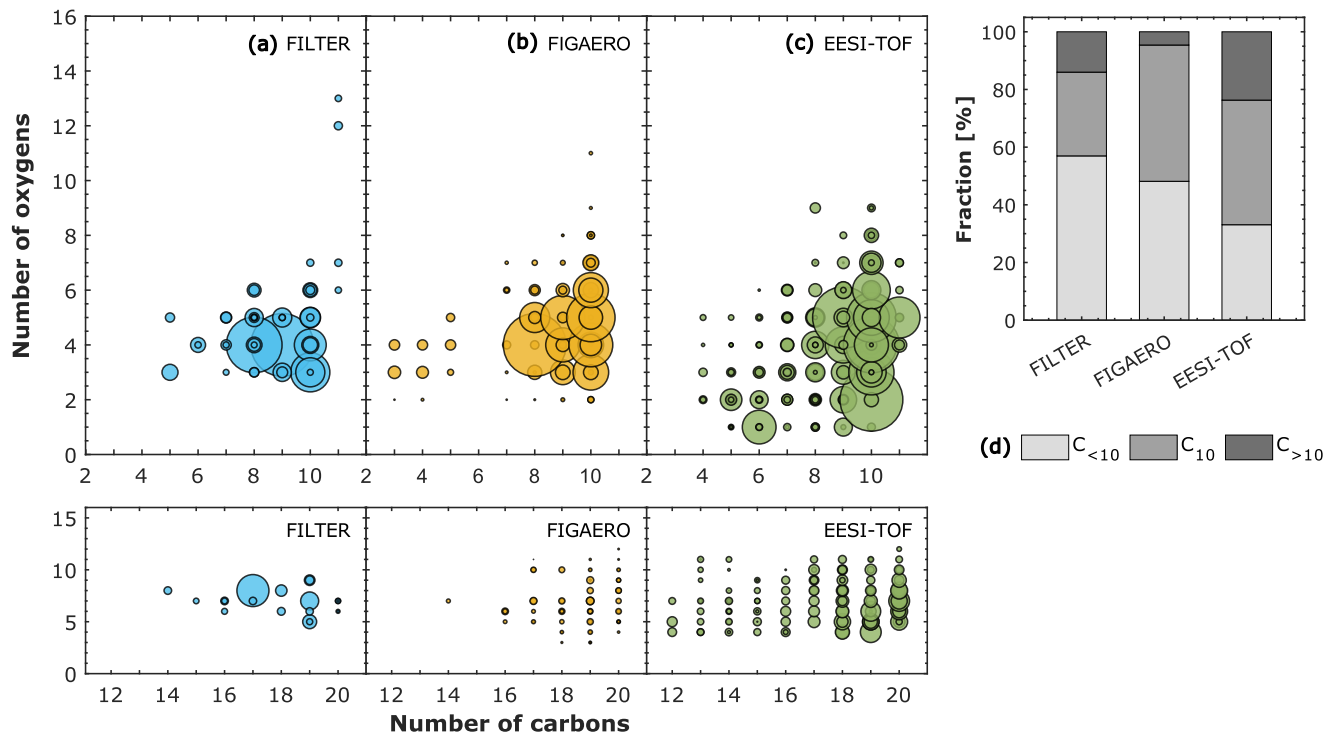

80

85 **Figure S5.** Number of oxygen atoms against the number of carbon atoms for  $\alpha$ -pinene oxidation products in the particle-phase at -  
 10 °C and 80 % RH measured by three different techniques. (a) FILTER: Offline analysis of filters using Ultra-high-performance  
 liquid chromatography (UHPLC) and heated electrospray ionization (HESI) coupled to an Orbitrap high-resolution mass  
 spectrometer (HRMS). (b) FIGAERO: Filter Inlet for Gases and AEROsols coupled to an I high-resolution time-of-flight  
 chemical-ionization mass spectrometer, and (c) EESI-TOF: Extractive Electrospray  $\text{Na}^+$  Ionization time-of-flight mass  
 spectrometer. The level of  $\alpha$ -pinene was between 1 and 3 ppbv while the ozone level was ~100 ppbv. The symbol sizes in (a), (b),  
 and (c) represent the intensities normalized by the total signal in each system. (d) Fraction of species in the particle-phase  
 containing less than 10 carbon atoms ( $C_{<10}$ ), 10 carbon atoms ( $C_{10}$ ), and more than 10 carbon atoms ( $C_{>10}$ ). The fraction was  
 90 calculated by normalizing the intensities by the total signal in each system.

95

100

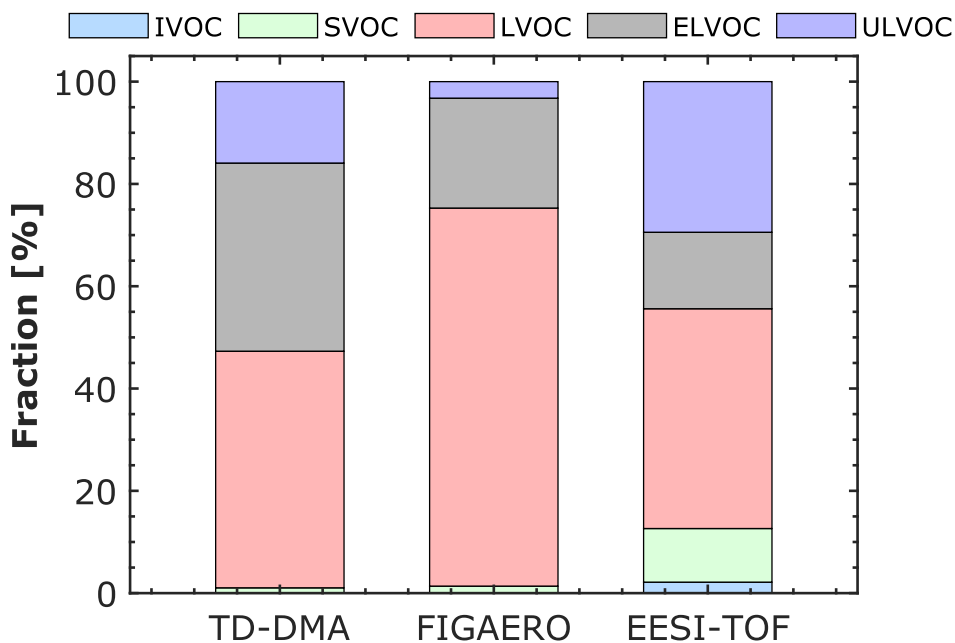

105 **Figure S6.** Fraction of volatility regimes for  $\alpha$ -pinene oxidation products in the particle-phase at  $-50\text{ }^{\circ}\text{C}$  and  $20\text{ }\%$  RH measured by three different techniques: (TD-DMA) Thermal Desorption-Differential Mobility Analyzer coupled to a  $\text{NO}_3^-$  chemical ionization-atmospheric-pressure-interface-time-of-flight mass spectrometer, (FIGAERO) Filter Inlet for Gases and AEROsols coupled to an  $\text{I}^-$  high-resolution time-of-flight chemical-ionization mass spectrometer, and (EESI-TOF) Extractive Electrospray  $\text{Na}^+$  Ionization time-of-flight mass spectrometer. The level of  $\alpha$ -pinene was between 1 and 6 ppbv while Ozone level was  $\sim 100$  ppbv. The volatility regimes (ULVOC, ELVOC, LVOC, SVOC, IVOC) were defined as in Donahue et al. (2012) and in Schervish and Donahue (2020).

110

115

120

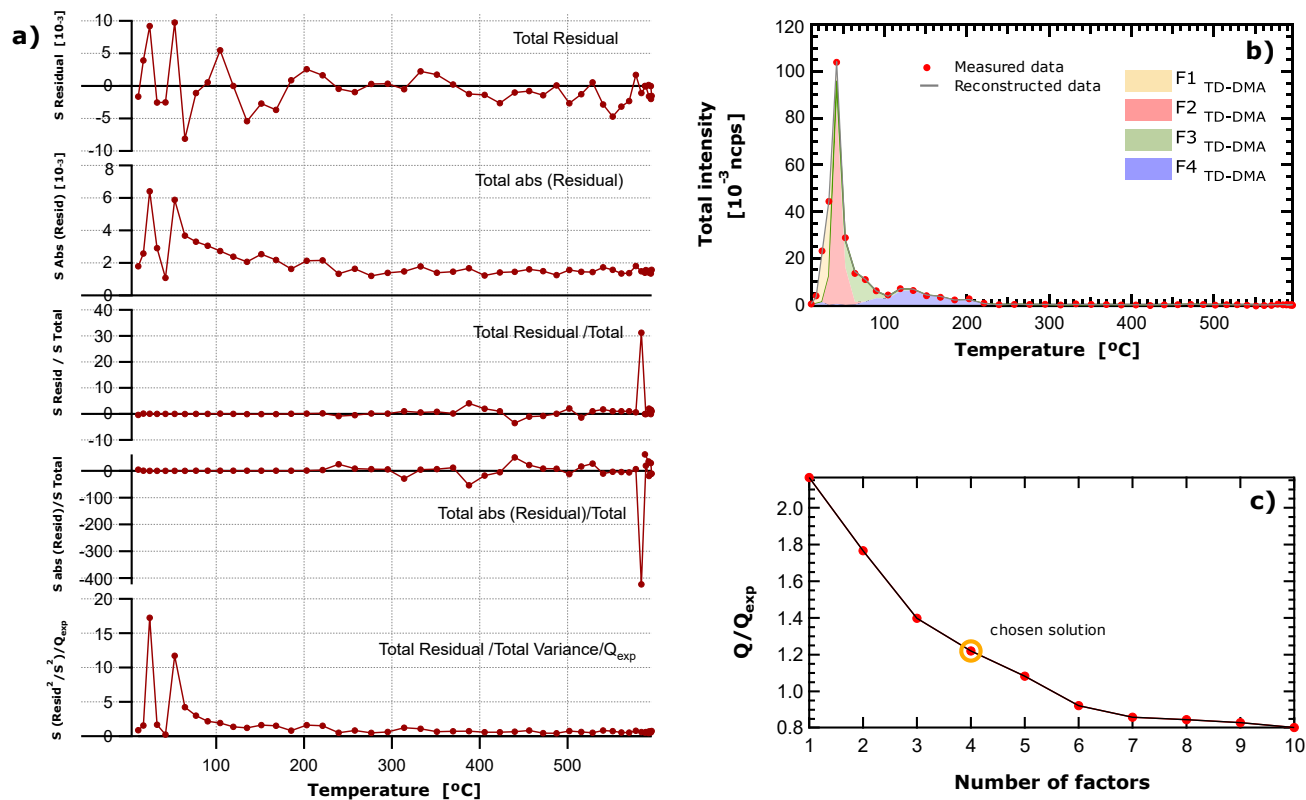

125

Figure S7. a) Residuals for TD-DMA 4-Factor solution expressed in terms of total residual, absolute residual, variance and  $Q_{\text{exp}}$  (square of the residual scaled with the error summed over all ions and observations) against the temperature. More details about the calculation and interpretation of these quantities can be found in Buchholz et al. (2020); b) Measured and reconstructed TD-DMA total intensity against the temperature, the contribution of the factors are shown with different colors, and c)  $Q/Q_{\text{exp}}$  vs Number of factors.  $Q/Q_{\text{exp}}$  is an optimization parameter based on the residuals and described in Buchholz et al. (2020), in the ideal case  $Q/Q_{\text{exp}}$  is equal to 1.

130



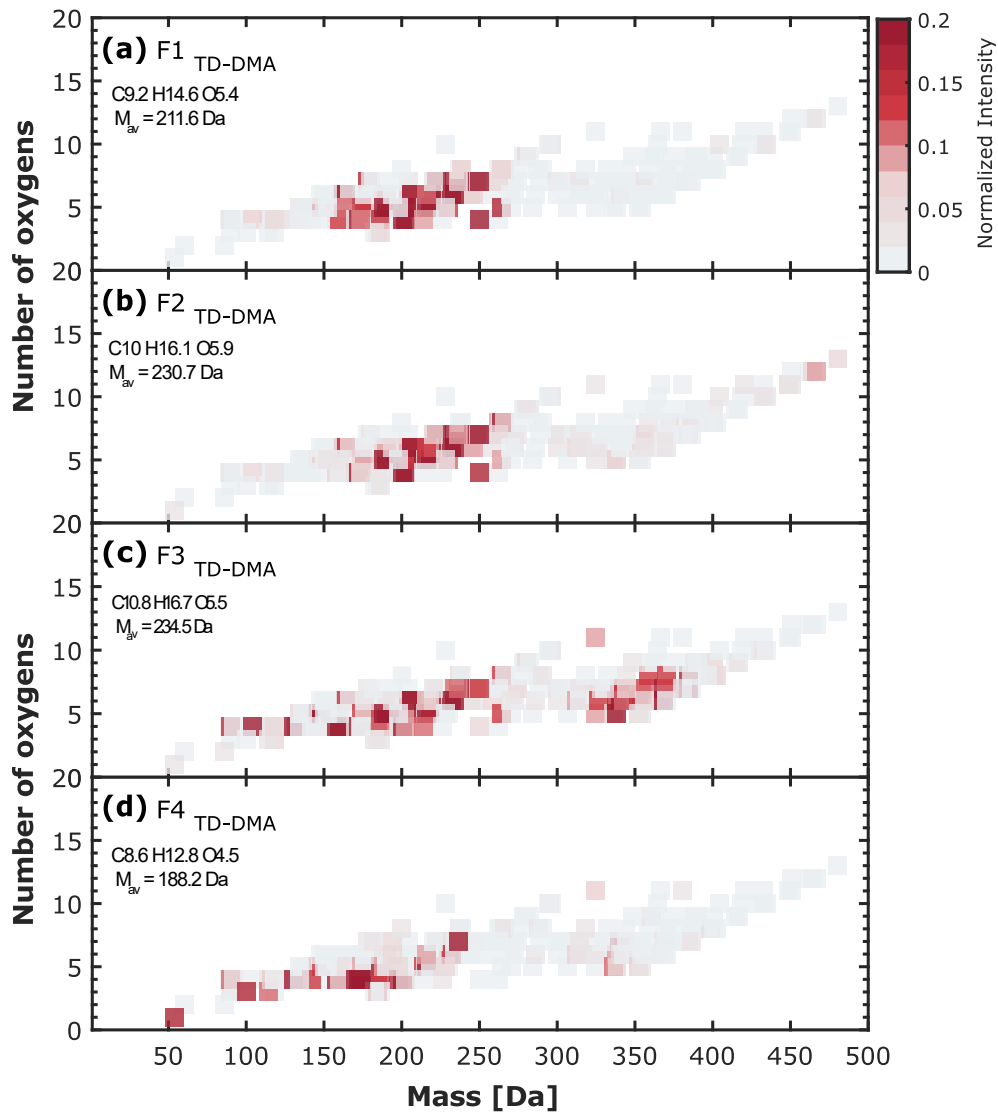

135 **Figure 8.** PMF suggested solution on the particle-phase detected by the TD-DMA in  $\alpha$ -pinene ozonolysis experiment at  $-30 \text{ }^\circ\text{C}$  and  $20 \text{ \% RH}$ , (a) F1<sub>TD-DMA</sub>, (b) F2<sub>TD-DMA</sub>, (c) F3<sub>TD-DMA</sub> and, (d) F4<sub>TD-DMA</sub> are the factors mass spectra expressed in terms of number of oxygens against the neutral ion mass. The colorscale represents the intensity normalized by the total particle signal. The particle-phase signal has been background corrected.

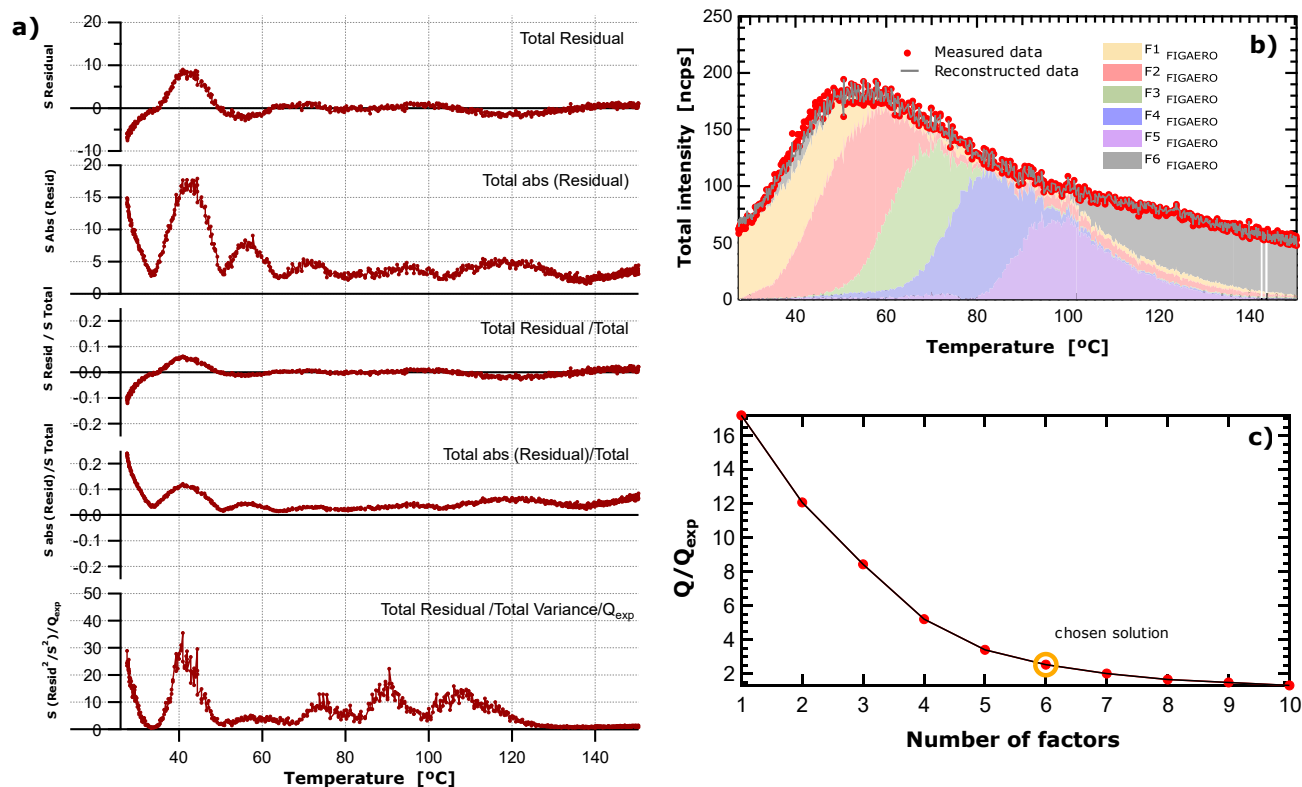

145 **Figure S9.** a) Residuals for FIGAERO 6-Factor solution expressed in terms of total residual, absolute residual, variance and  $Q_{\text{exp}}$  (square of the residual scaled with the error summed over all ions and observations) against the temperature. More details about the calculation and interpretation of these quantities can be found in Buchholz et al. (2020); b) Measured and reconstructed FIGAERO total intensity against the temperature, the contribution of the factors are shown with different colors, and c)  $Q/Q_{\text{exp}}$  vs Number of factors.  $Q/Q_{\text{exp}}$  is an optimization parameter based on the residuals and described in Buchholz et al. (2020), in the ideal case  $Q/Q_{\text{exp}}$  is equal to 1.

150

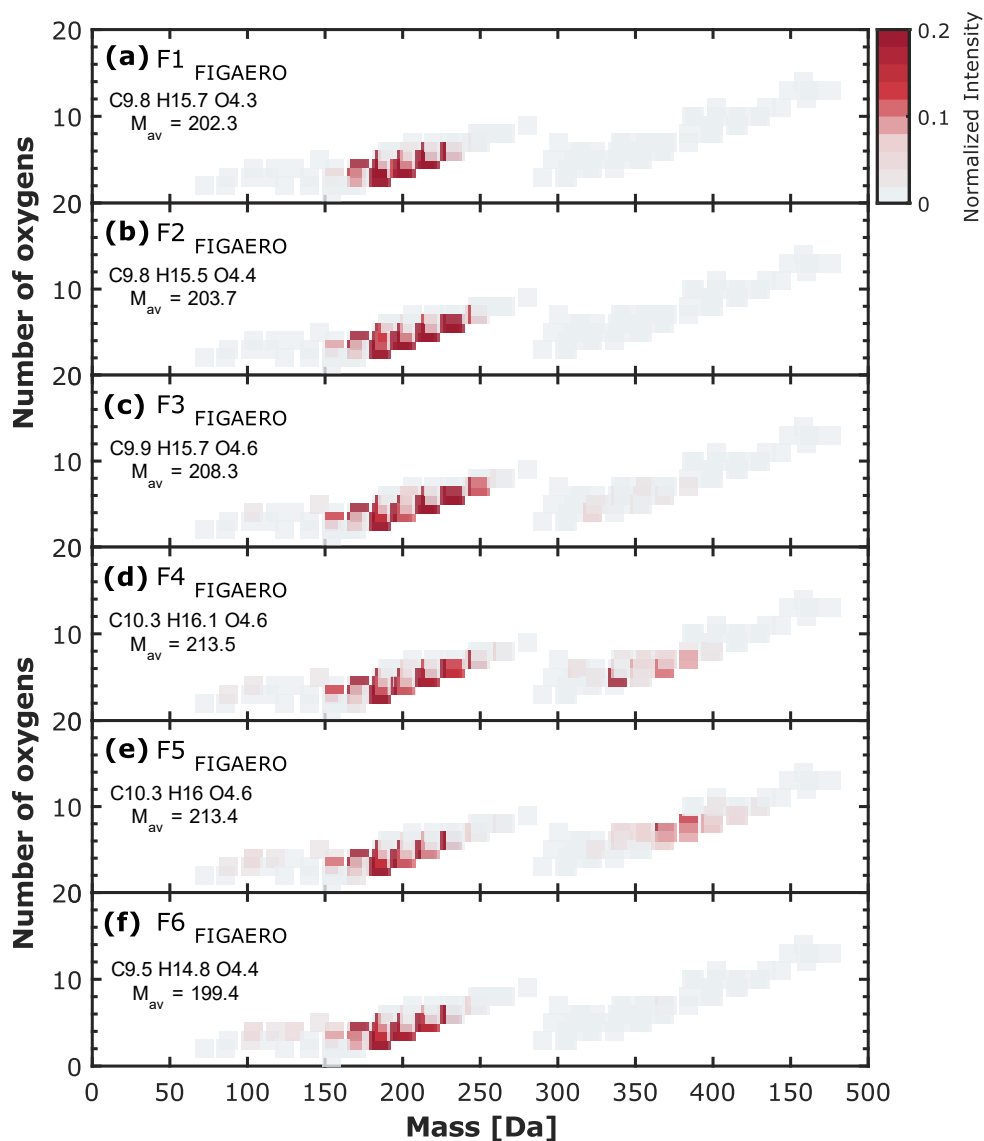

155 **Figure S10.** PMF suggested solution on the particle-phase detected by FIGAERO in  *$\alpha$* -pinene ozonolysis experiment at -30 °C and 20 % RH, (a) F1 FIGAERO, (b) F2 FIGAERO, (c) F3 FIGAERO, (d) F4 FIGAERO, (e) F5 FIGAERO and, (f) F6 FIGAERO are the factors mass spectra expressed in terms of number of oxygens against the neutral ion mass. The colorscale represents the intensity normalized by the total particle signal. The particle-phase signal has been background corrected.

160

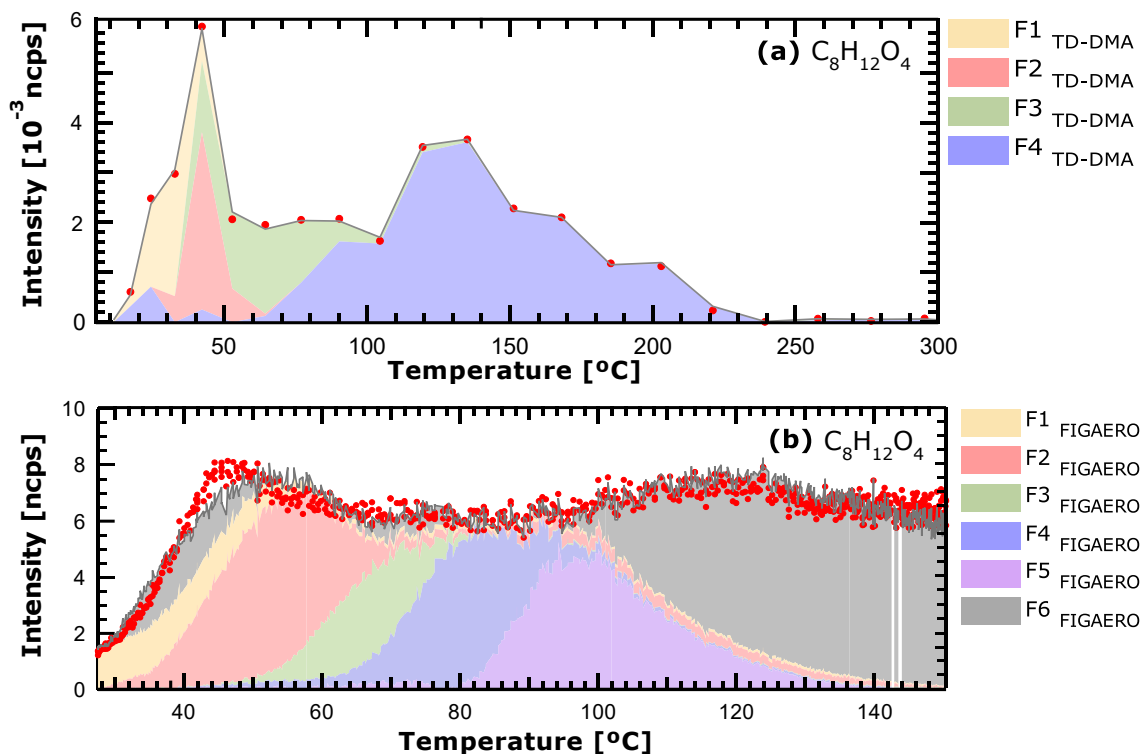

165 Figure S11. Factor thermograms on the PMF suggested solutions for  $C_8H_{12}O_4$  measured by (a) TD-DMA and (b) FIGAERO in the  $\alpha$ -pinene ozonolysis experiment at  $-30^{\circ}C$  and 20 % RH.

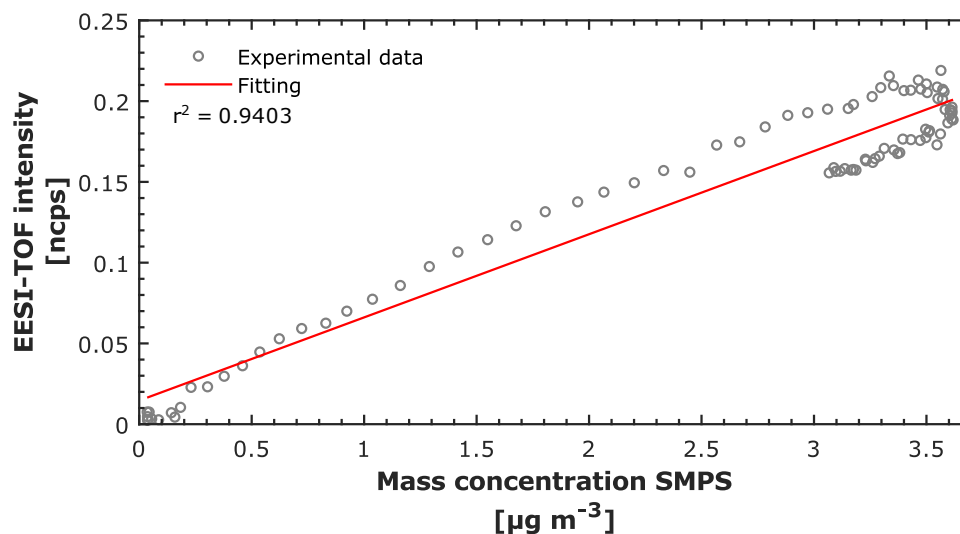

170 Figure S12. Correlation plot of total EESI intensity in ncps and the mass concentration calculated from the SMPS for the representative experiment shown in Fig. S6. The EESI-TOF particle signal was averaged every 5 minutes for correlation with the SMPS.

Buchholz, A., Ylisimiö, A., Huang, W., Mohr, C., Canagaratna, M., Worsnop, D. R., Schobesberger, S., and Virtanen, A.: Deconvolution of FIGAERO–CIMS thermal desorption profiles using positive matrix factorisation to identify chemical and physical processes during particle evaporation, *Atmos. Chem. Phys.*, 20, 7693–7716, 10.5194/acp-20-7693-2020, 2020.
